# Supplementary material for: Alternative evolution of a spheroidal colony in volvocine algae: developmental analysis of embryogenesis in Astrephomene (Volvocales, Chlorophyta)
Source: PubMed Central journal article supplement (PMC5103382; doi:10.1186/s12862-016-0794-x), 2016-11-09
Supplement: 12862_2016_794_MOESM5_ESM.pdf [file 12862_2016_794_MOESM5_ESM.pdf]

**Additional file 5:**

**Figure S1–S4**

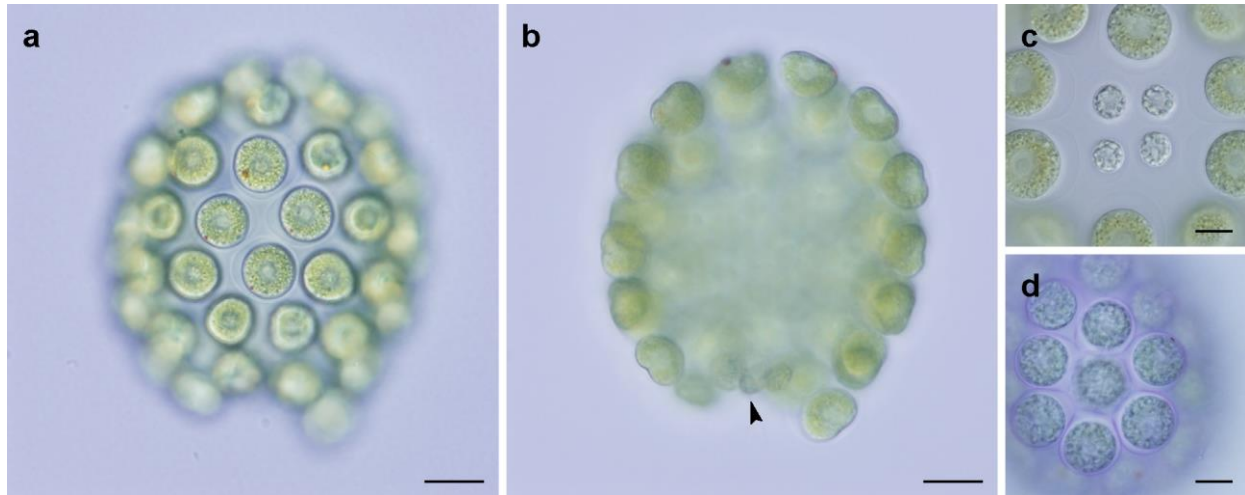

**Figure S1 Morphological observation of vegetative colonies in *Astrephomene gubernaculifera* strain 2014-1002-YkAs8.** Light microscopy of mature vegetative colonies in one-day-old culture was carried out with a BX53 microscope (Olympus, Tokyo, Japan) equipped with Nomarski interference optics. Based on the number of posterior somatic cells in 64-celled colonies and the characteristic of cellular sheaths [1], the *Astrephomene* strain 2014-1002-YkAs8 was identified as *Astrephomene gubernaculifera*. **a** Surface view of a 64-celled colony. Scale bar: 20  $\mu\text{m}$ . **b** Median optical section of a 64-celled colony. Note small somatic cells at the posterior pole of colony (*arrowhead*). Scale bar: 20  $\mu\text{m}$ . **c** Four somatic cells at the posterior pole of 64-celled embryo. Note the somatic cells are smaller and paler than reproductive cells. Scale bar: 10  $\mu\text{m}$ . **d** Cellular sheaths stained with diluted methylene blue. Note cellular sheaths attached to each other without fenestrations. Scale bar: 10  $\mu\text{m}$ .

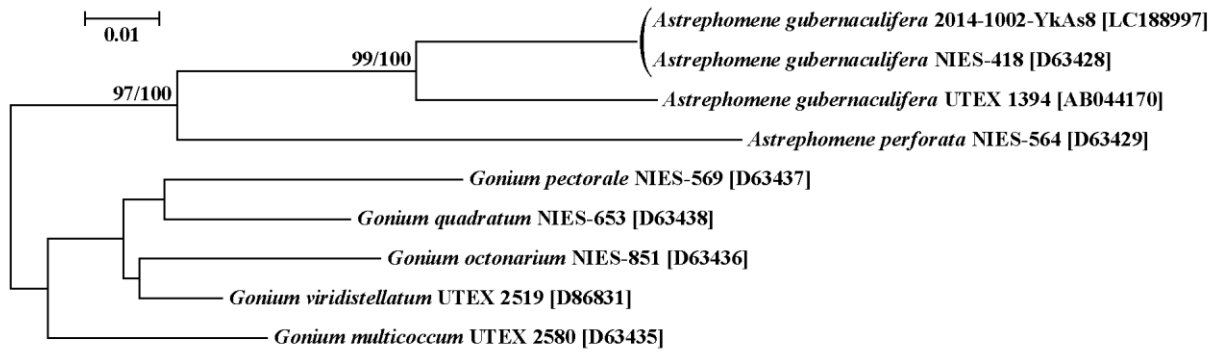

**Figure S2 Maximum-likelihood tree of *Astrephomene* and *Gonium* based on *rbcL* genes.** The coding region of *rbcL*, the chloroplast gene for the large subunit of RuBisCO, of *A. gubernaculifera* strain 2014-1002-YkAs8 were sequenced with essentially the same method in previous research [2–5]. The 1,128 bp corresponded to position 31-1,158 of *rbcL* from *Astrephomene* and *Gonium* (as outgroup) were subjected to maximum-likelihood analyses based on the GTR + G models with 1000 replicates of bootstrap analyses [6] performed by MEGA 6.06 [7]. As the sequence from *Astrephomene* strain 2014-1002-YkAs8 was completely the same as sequence from *A. gubernaculifera* NIES-418, they were treated as a single operational taxonomic unit. Accession numbers of sequence data were shown in brackets. Bootstrap value ( $\geq 50\%$ ) from maximum-likelihood (left), and neighbor-joining (right) are shown at branches.

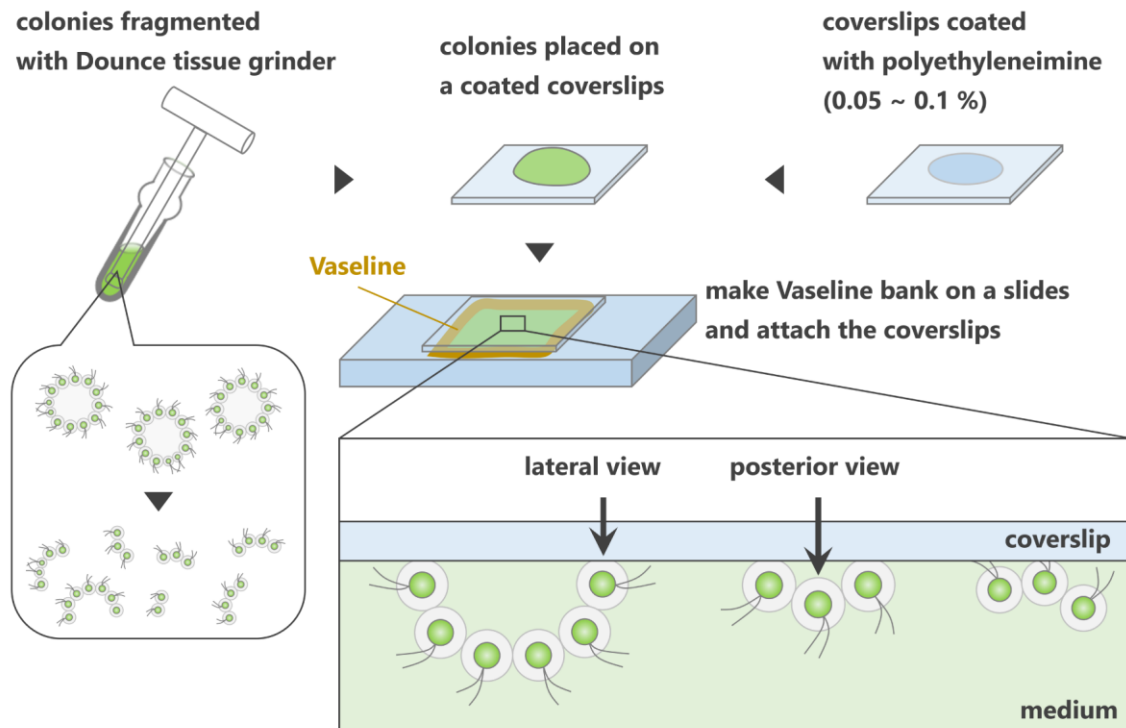

**Figure S3 Diagram of making preparations for light microscopy time-lapse imaging of *Astrephomene* embryogenesis.** In order to examine the embryos from anterior-lateral, lateral, posterior-lateral and posterior views, fully mature vegetative colonies of *Astrephomene* were fragmented into several parts with Dounce tissue grinder and attached to coverslips coated with polyethyleneimine. Then the coverslips were put on slides and sealed with Vaseline.

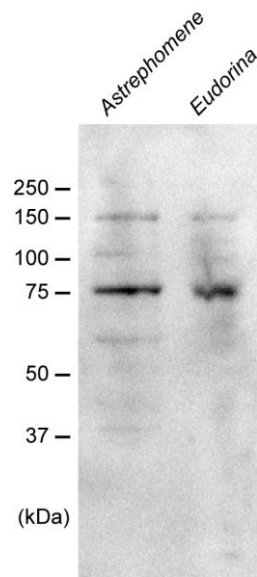

**Figure S4 Western blot of two species with anti-CrSAS-6 antibody.** The protein bands were detected with anti-CrSAS-6 antibody in *Astrephomene gubernaculifera* strain 2014-1002-YkAs8 and *Eudorina* sp. strain 2010-623-F1-E8. Western blotting analysis was carried out as described previously [8] for evaluation of the specificity of the antibody. Western blotting showed that the anti-CrSAS-6 antibody cross-reacted with SAS-6 from the two species.

## References for Additional file 5

1. Nozaki H. Morphology and taxonomy of two species of *Astrephomene* (Chlorophyta, Volvocales) in Japan. *J Jpn Bot.* 1983;58:345–52.
2. Fawley MW, Fawley KP. A simple and rapid technique for the isolation of DNA from microalgae. *J Phycol.* 2004;40:223–5.
3. Nakada T, Nozaki H. Re-evaluation of three *Chlorogonium* (Volvocales, Chlorophyceae) species based on 18S ribosomal RNA gene phylogeny. *Eur J Phycol.* 2007;42:177–82.
4. Nozaki H, Ito M, Sano R, Uchida H, Watanabe MM, Kuroiwa T. Phylogenetic relationships within the colonial volvocales (Chlorophyta) inferred from *rbcL* gene sequence data. *J Phycol.* 1995;31:970–9.
5. Nozaki H, Ito M, Sano R, Uchida H, Watanabe MM, Takahashi H, Kuroiwa T. Phylogenetic analysis of *Yamagishiella* and *Platydorina* (Volvocaceae, Chlorophyta) based on *rbcL* gene sequences. *J Phycol.* 1997;33:272–8.
6. Felsenstein J. Confidence limits on phylogenies: an approach using the bootstrap. *Evolution.* 1985;39:783–91.
7. Tamura K, Stecher G, Peterson D, Filipski A, Kumar S. MEGA6: Molecular Evolutionary Genetics Analysis version 6.0. *Mol Biol Evol.* 2013;30:2725–9.
8. Nakazawa Y, Hiraki M, Kamiya R, Hirono M. SAS-6 is a cartwheel protein that establishes the 9-fold symmetry of the centriole. *Curr Biol.* 2007;17:2169–74.
